# Supplementary material for: Circular RNA circFGFR1 Functions as an Oncogene in Glioblastoma Cells through Sponging to hsa-miR-224-5p
Source: Hindawi journal article supplement (doi:10.1155/2022/7990251), 2022-01-10

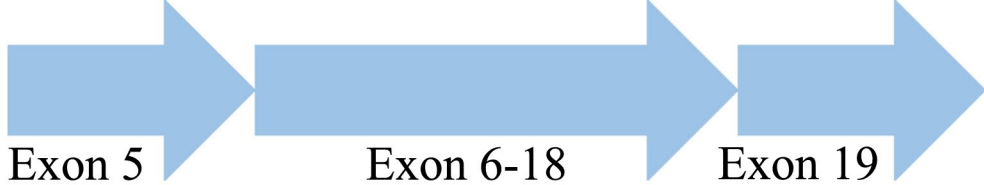

Exon 19      Exon 5  
**AACCAG** | **CCGTGA**

The diagram shows two red text sequences, 'AACCAG' and 'CCGTGA', separated by a vertical line. Above 'AACCAG' is the label 'Exon 19' and above 'CCGTGA' is the label 'Exon 5'. Dashed lines connect these labels to the sequences above.

Back-splice site

The text 'Back-splice site' is centered below the two red sequences. A vertical dashed line descends from the junction between the two sequences to this text.

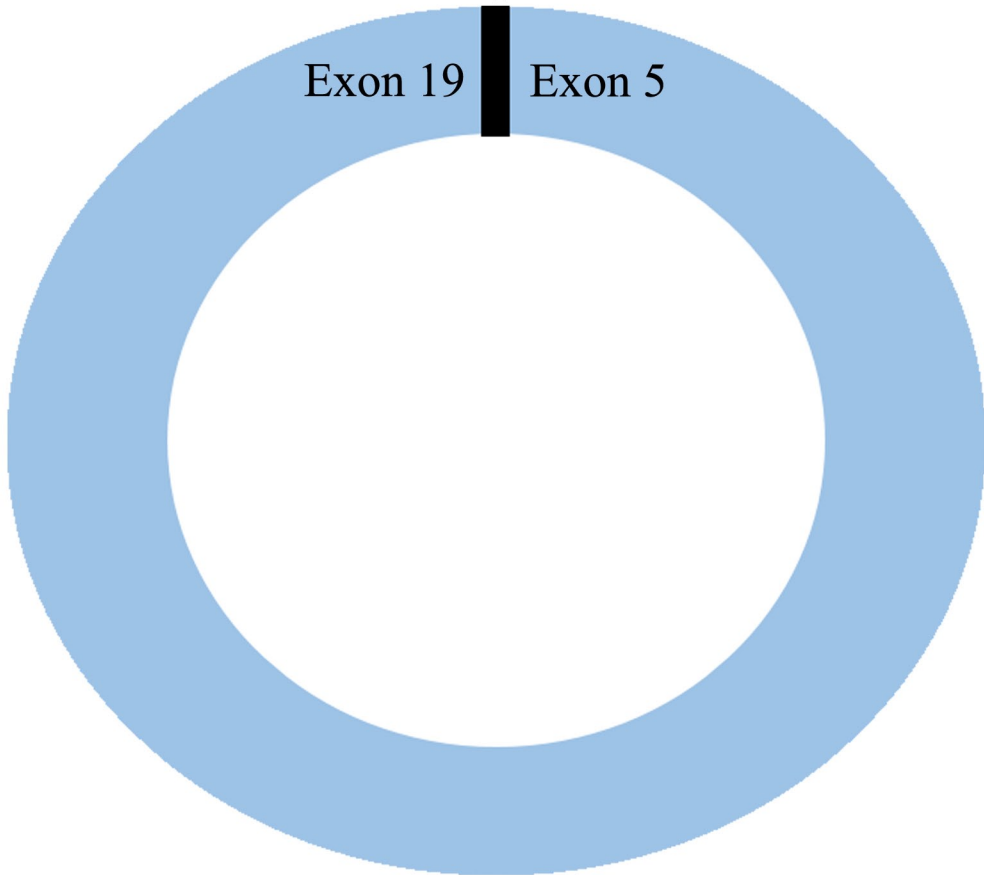

Supplement: f2 [file 7990251.f2.pdf]
